# Supplementary material for: British Thoracic Society adult community acquired pneumonia audit 2009/10
Source: HighWire-hosted journal article supplement (doi:10.1136/thoraxjnl-2011-200081), 2011-04-17
Supplement: Thorax_Table3_200081.pdf [file Thorax_Table3_200081.pdf]

Table w3 : Empirical antibiotics administered (n=2742)

| <b><i>Antibiotics</i></b>        | <b><i>n</i></b> | <b><i>%</i></b> |
|----------------------------------|-----------------|-----------------|
| <b><i><u>Beta-lactam</u></i></b> | 2060            | 75.16           |
| Amoxicillin, oral                | 367             | 13.39           |
| Amoxicillin, IV                  | 284             | 10.36           |
| Penicillin V, oral               | 11              | 0.40            |
| Benzympenicillin, IV             | 338             | 12.33           |
| Cephalosporin, oral              | 7               | 0.26            |
| Cephalosporin, IV                | 104             | 3.79            |
| Co-amoxiclav, oral               | 151             | 5.51            |
| Co-amoxiclav, IV                 | 798             | 29.11           |
| <b><i><u>Macrolide</u></i></b>   | 1641            | 59.87           |
| Clarithromycin, oral             | 657             | 23.97           |
| Clarithromycini, IV              | 905             | 33.02           |
| Erythromycin, oral               | 65              | 2.37            |
| Erythromycin, IV                 | 14              | 0.51            |
| <b><i><u>Others</u></i></b>      |                 |                 |
| Tazocin                          | 332             | 12.11           |
| Ertapenem                        | 35*             | 1.28            |
| Meropenem                        | 27              | 0.99            |
| Quinolone                        | 52              | 1.90            |
| Doxycycline                      | 229             | 8.35            |

Total exceeds number of patients as some received more than 1 antibiotic.

IV = intravenous.

\* All given at a single centre
